# Supplementary material for: Conjugated copolymers bearing 2,7-dithienylphenanthrene-9,10-dialkoxy units: highly soluble and stable deep-blue emissive materials
Source: Royal Society of Chemistry journal article supplement (doi:10.1039/d0nj01712d), 2020-01-01
Supplement: d0nj01712d1.pdf [file d0nj01712d1.pdf]

## Supplementary Information

# Conjugated Copolymers Bearing 2,7-Dithienylphenanthrene-9,10-dialkoxy Units: Highly Soluble and Stable Deep-Blue Emissive Materials

Noorullah Baig,<sup>a,b</sup> Suchetha Shetty,<sup>a,b</sup> Sadiara Fall,<sup>c</sup> Saleh Al-Mousawi,<sup>d</sup> Thomas Heiser,<sup>c</sup>  
Bassam Alameddine<sup>a,b\*</sup>

<sup>a</sup> Department of Mathematics and Natural Sciences, Gulf University for Science and Technology, Kuwait.

<sup>b</sup> Functional Materials Group - CAMB, GUST, Kuwait.

<sup>c</sup> Laboratoire ICube, Université de Strasbourg, CNRS, UMR 7357, 23 rue du Loess, Strasbourg, France.

<sup>d</sup> Department of Chemistry, University of Kuwait, Kuwait.

Tel: +965 2530 7476.

*E-mail address:* [alameddine.b@gust.edu.kw](mailto:alameddine.b@gust.edu.kw)

## Contents

|                                                            |                |
|------------------------------------------------------------|----------------|
| <sup>1</sup> H NMR spectrum of <b>PNM1-4</b>               | Figure S1-S4   |
| <sup>1</sup> H NMR spectrum of <b>PNP1-4</b>               | Figure S5-S8   |
| <sup>13</sup> C NMR spectrum of <b>PNM1-4</b>              | Figure S9-S12  |
| <sup>13</sup> C NMR spectrum of <b>PNP2-4</b>              | Figure S13-S15 |
| EI-HRMS of <b>PNM2-4</b>                                   | Figure S16-S18 |
| GPC Chromatogram of <b>PNP1-4</b>                          | Figure S19-S22 |
| Output and transfer characteristics of <b>PNP1-2</b> OFETs | Figure S23-24  |
| DFT calculations                                           | Tables S1-2    |

---

\*Corresponding author. *E-mail address:* [alameddine.b@gust.edu.kw](mailto:alameddine.b@gust.edu.kw)

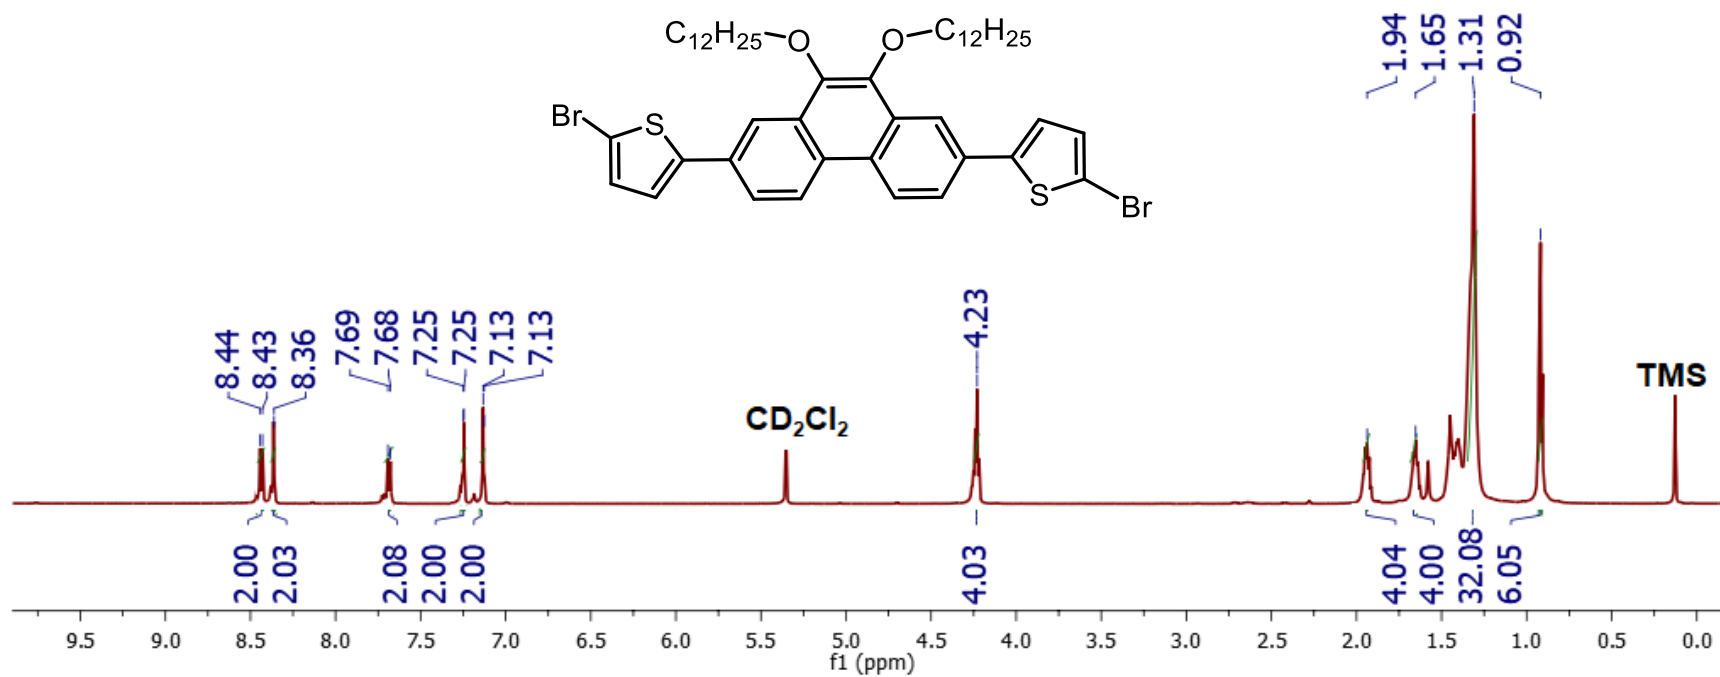

**Figure S1:** <sup>1</sup>H NMR spectrum of PNM1 (CD<sub>2</sub>Cl<sub>2</sub>, 600 MHz)

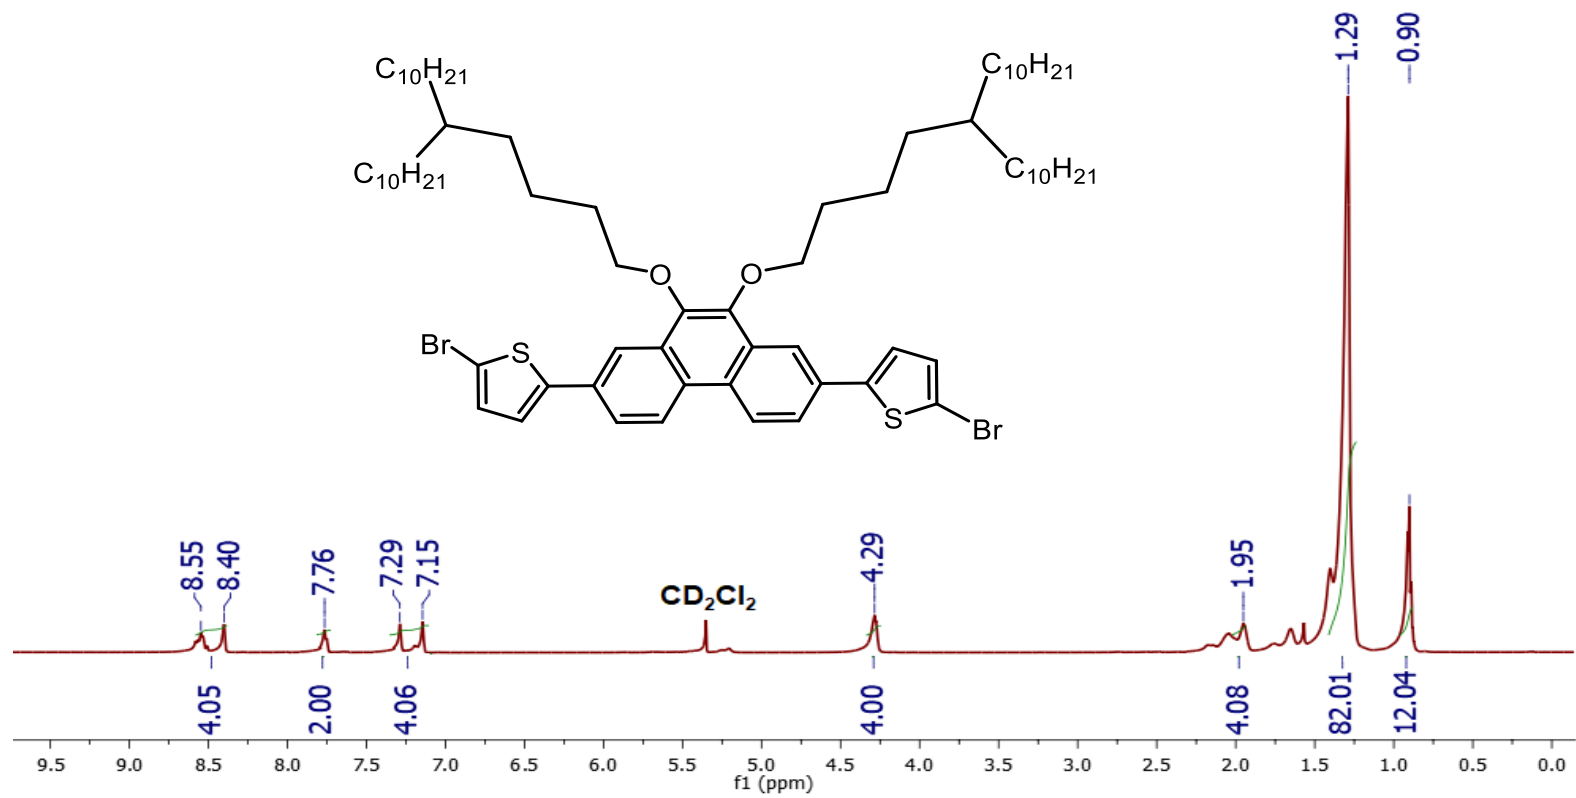

Figure S2: <sup>1</sup>H NMR spectrum of PNM2 (CD<sub>2</sub>Cl<sub>2</sub>, 600 MHz)

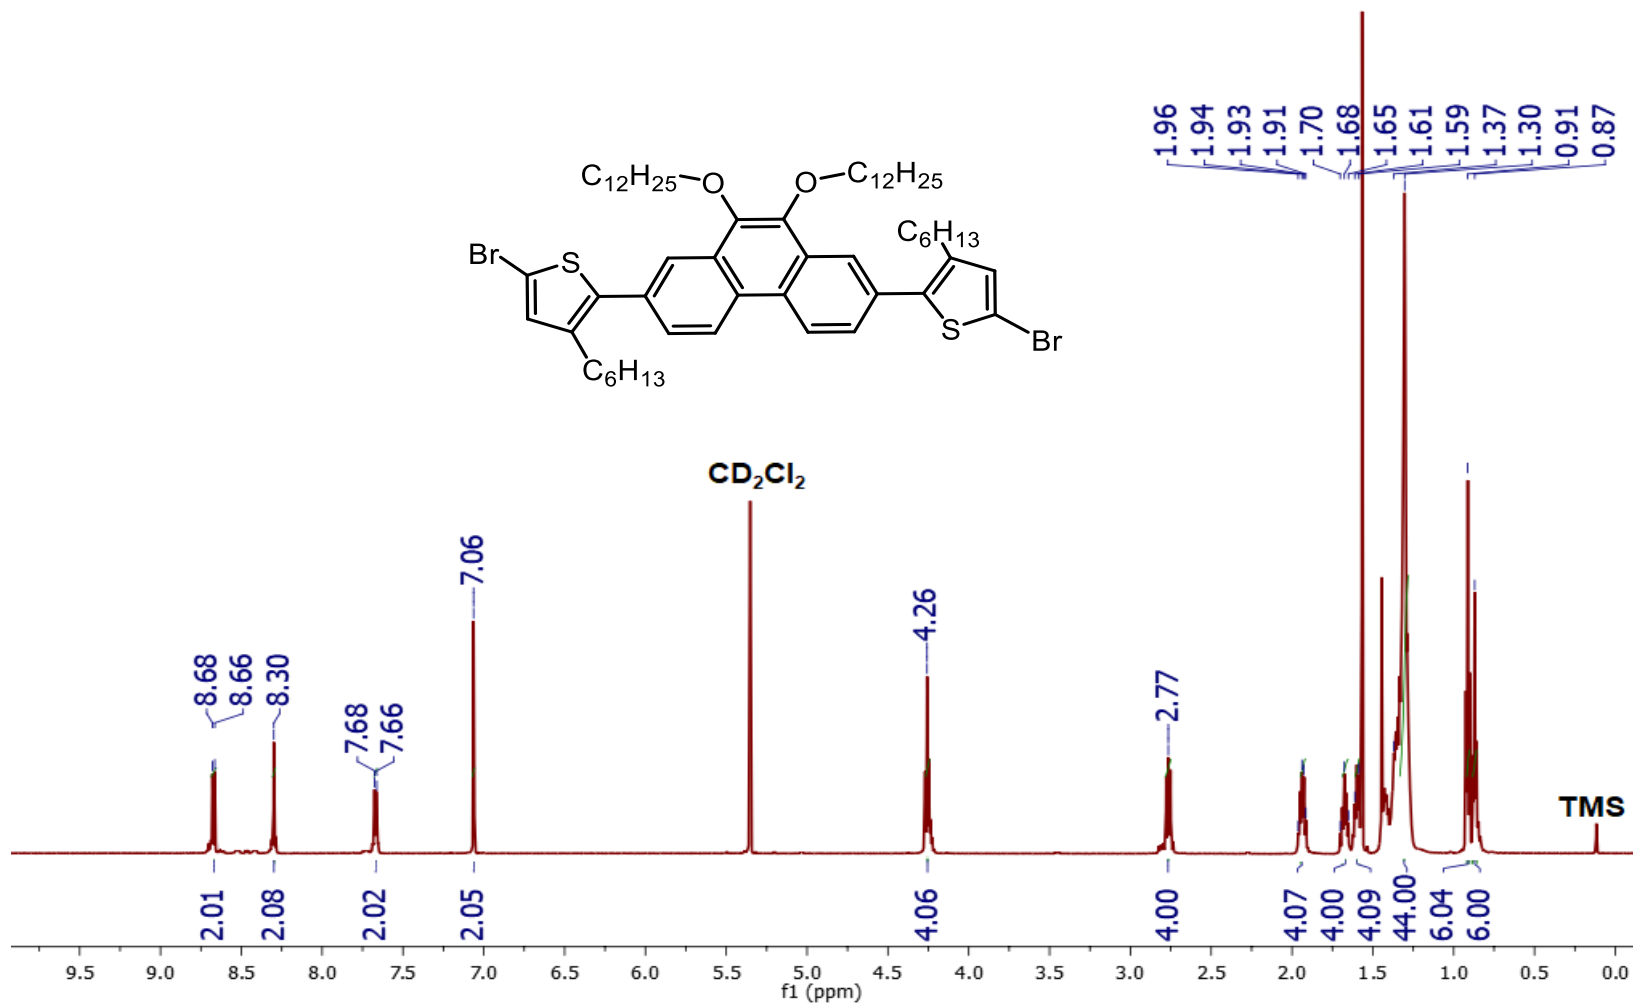

**Figure S3:** <sup>1</sup>H NMR spectrum of **PNM3** (CD<sub>2</sub>Cl<sub>2</sub>, 600 MHz)

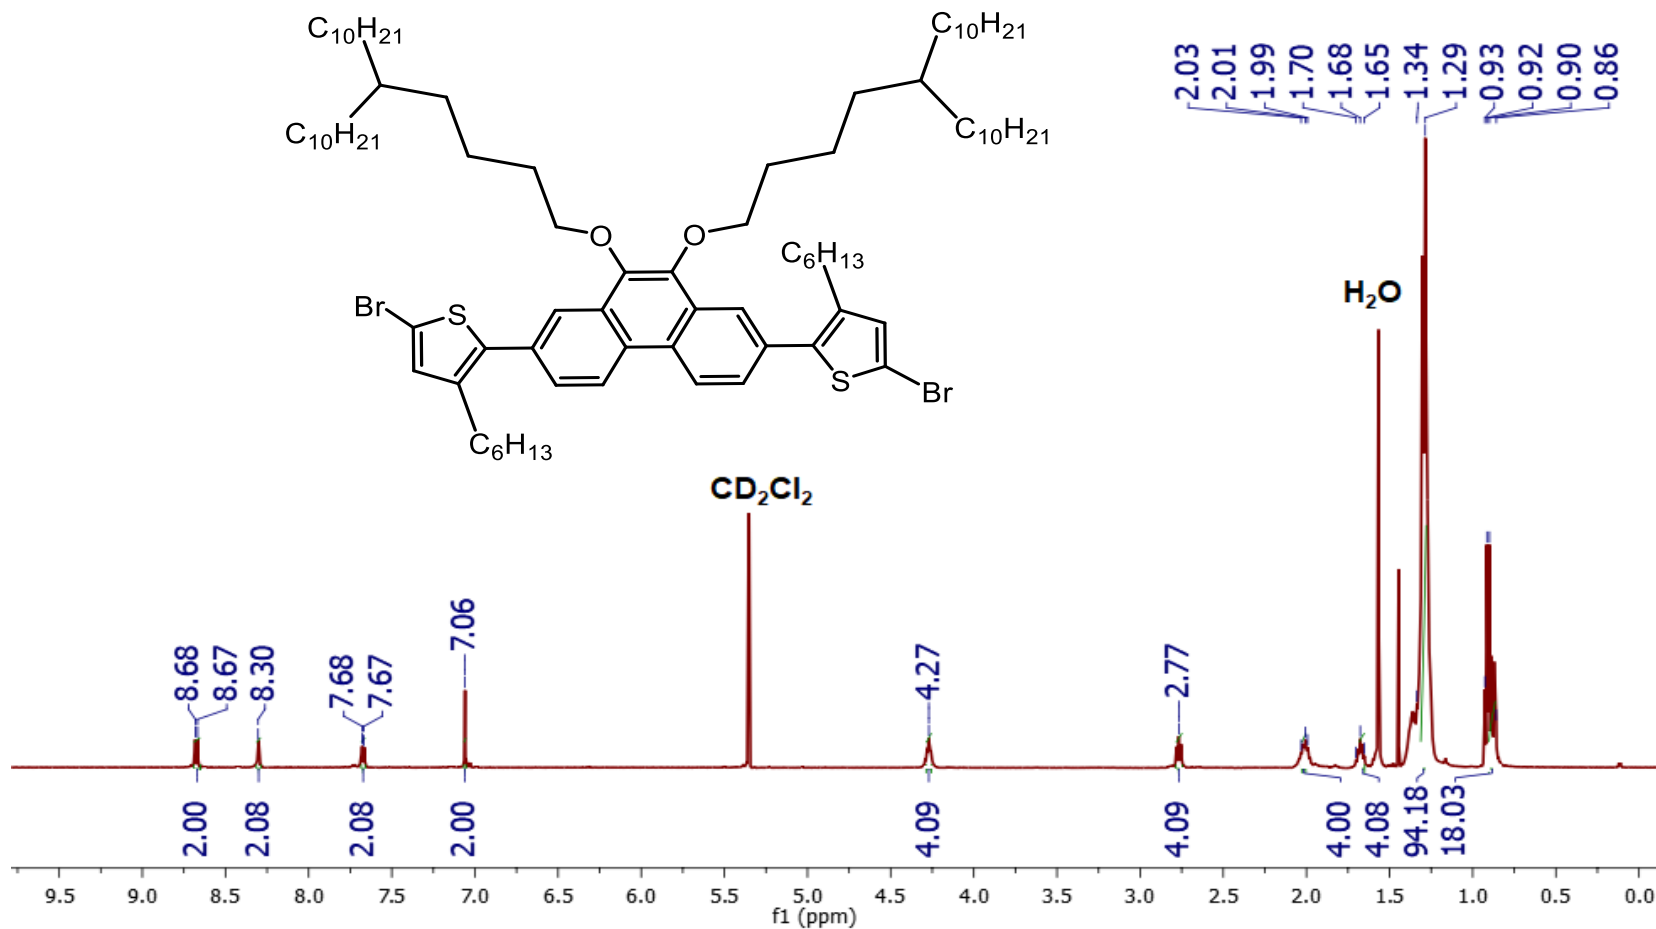

Figure S4:  $^1\text{H}$  NMR spectrum of PNM4 ( $\text{CD}_2\text{Cl}_2$ , 600 MHz)

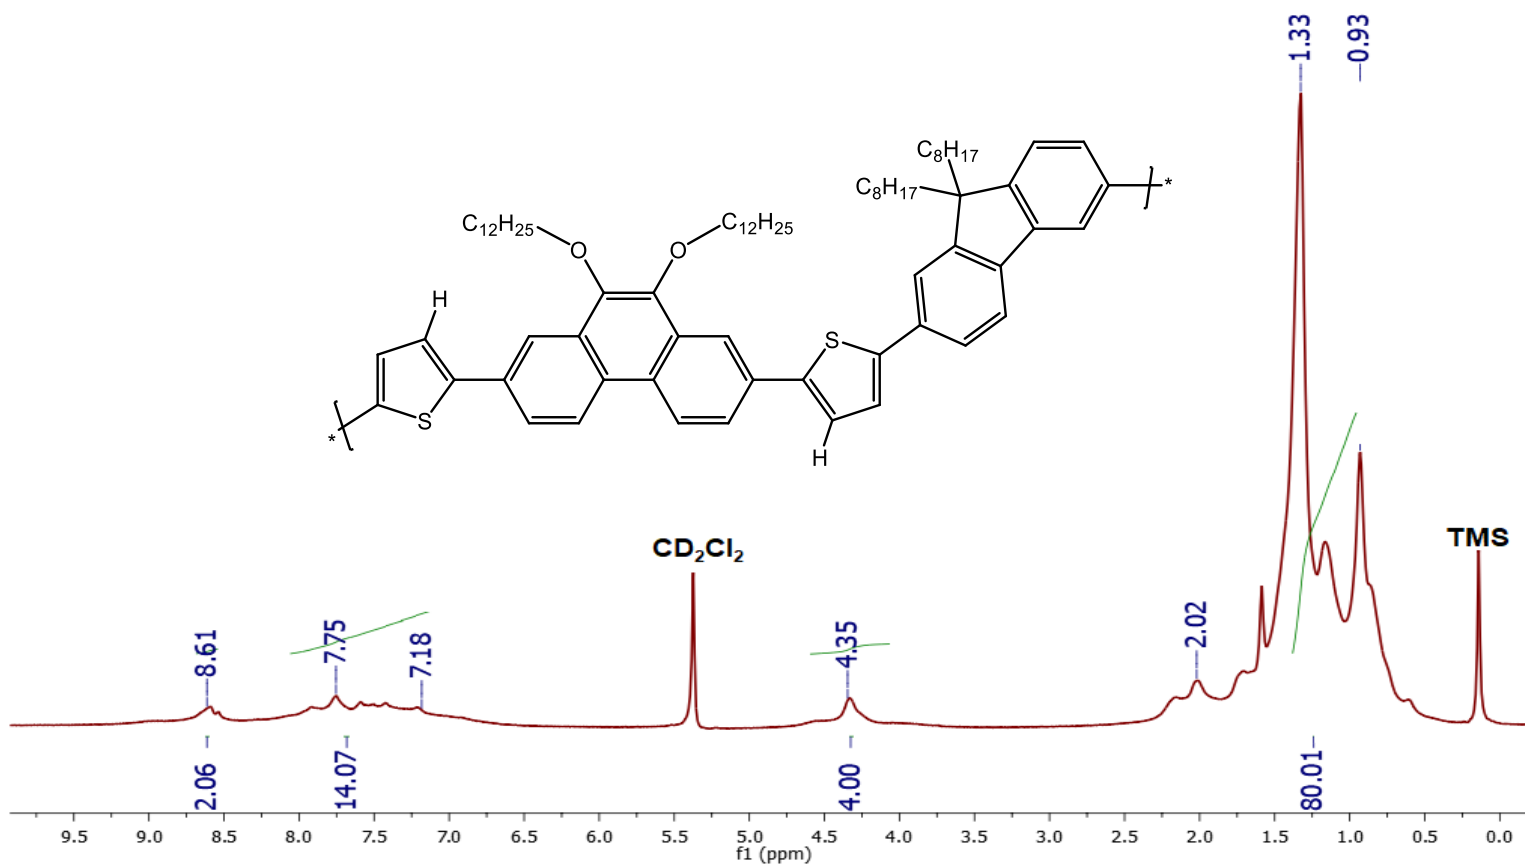

**Figure S5:**  $^1\text{H}$  NMR spectrum of **PNP1** ( $\text{CD}_2\text{Cl}_2$ , 600 MHz)

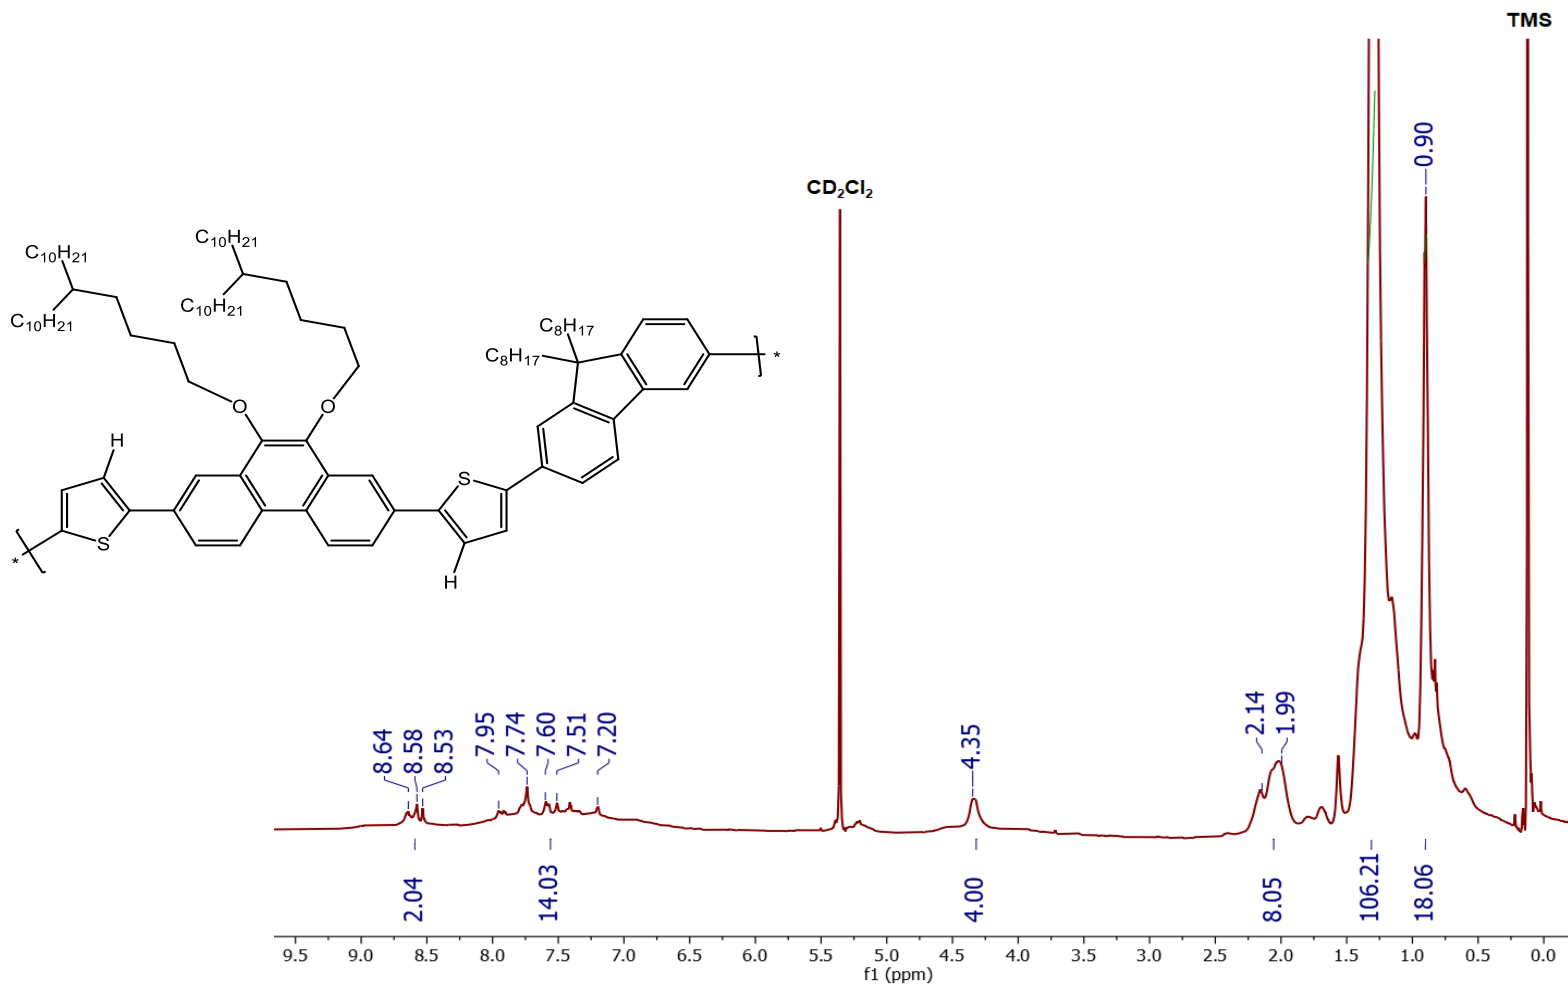

Figure S6: <sup>1</sup>H NMR spectrum of PNP2 (CD<sub>2</sub>Cl<sub>2</sub>, 600 MHz)

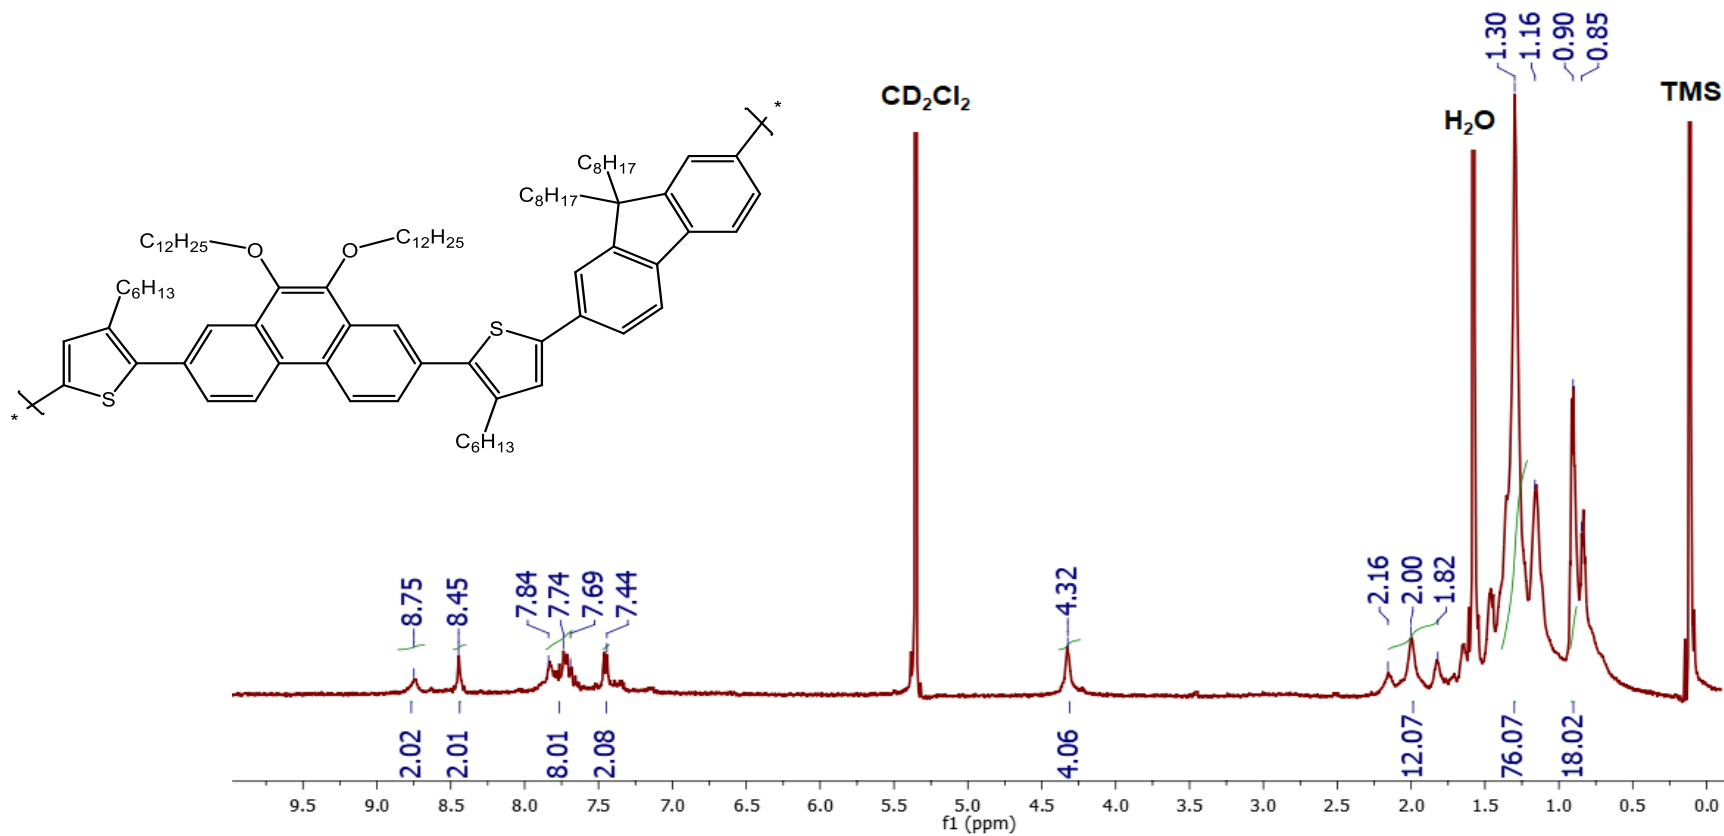

**Figure S7:** <sup>1</sup>H NMR spectrum of PNP3 (CD<sub>2</sub>Cl<sub>2</sub>, 600 MHz)



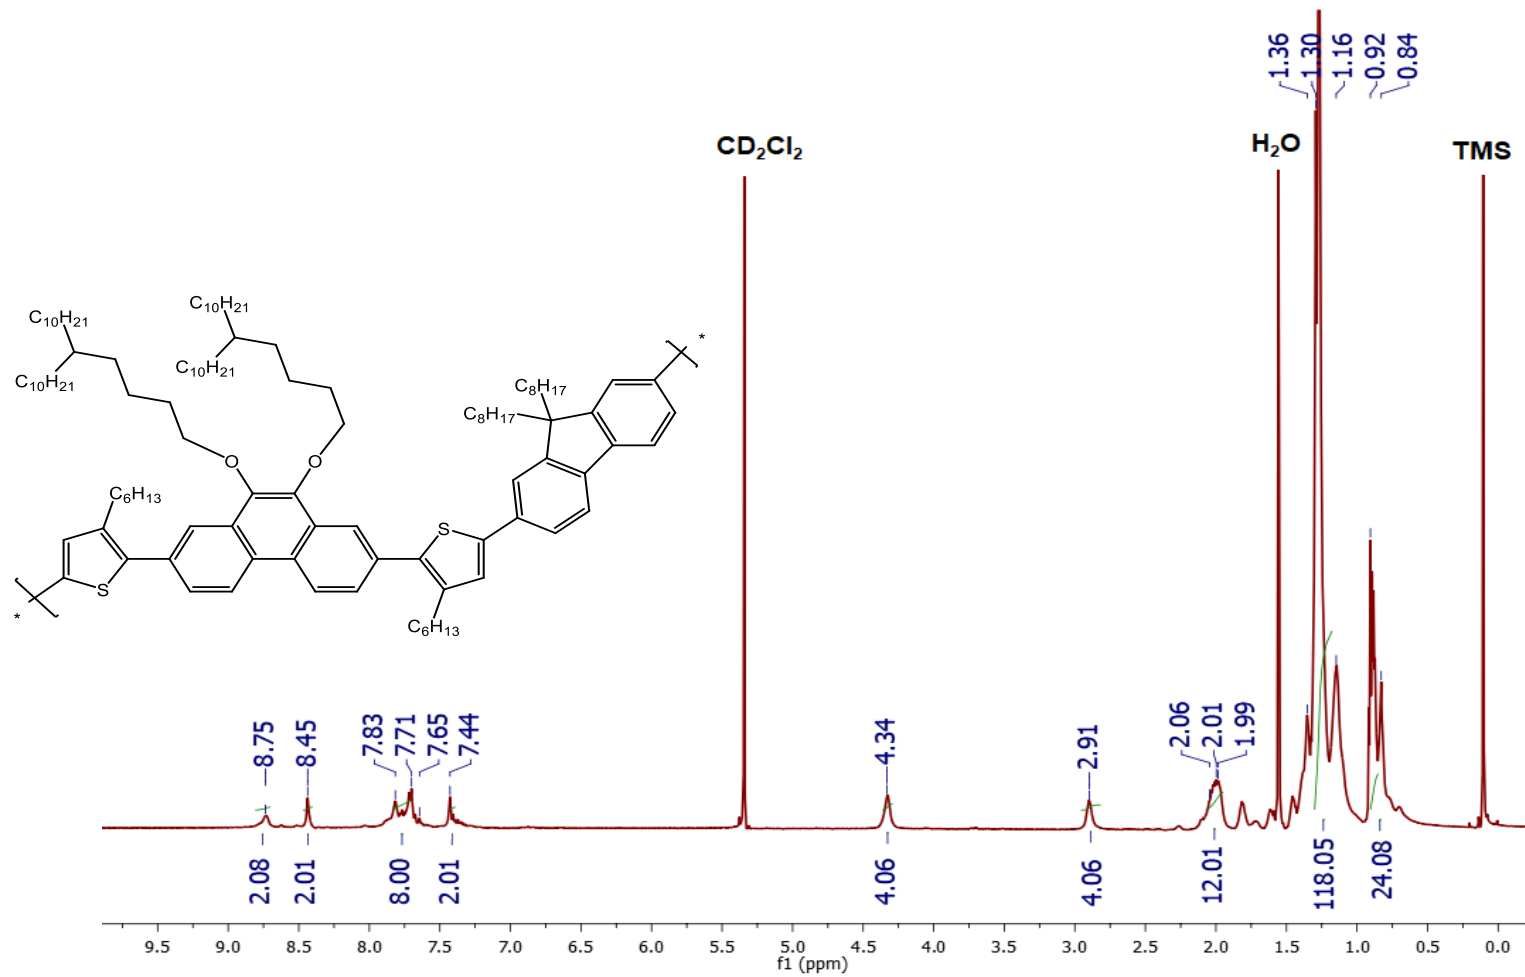

Figure S8:  $^1\text{H}$  NMR spectrum of **PNP4** ( $\text{CD}_2\text{Cl}_2$ , 600 MHz)

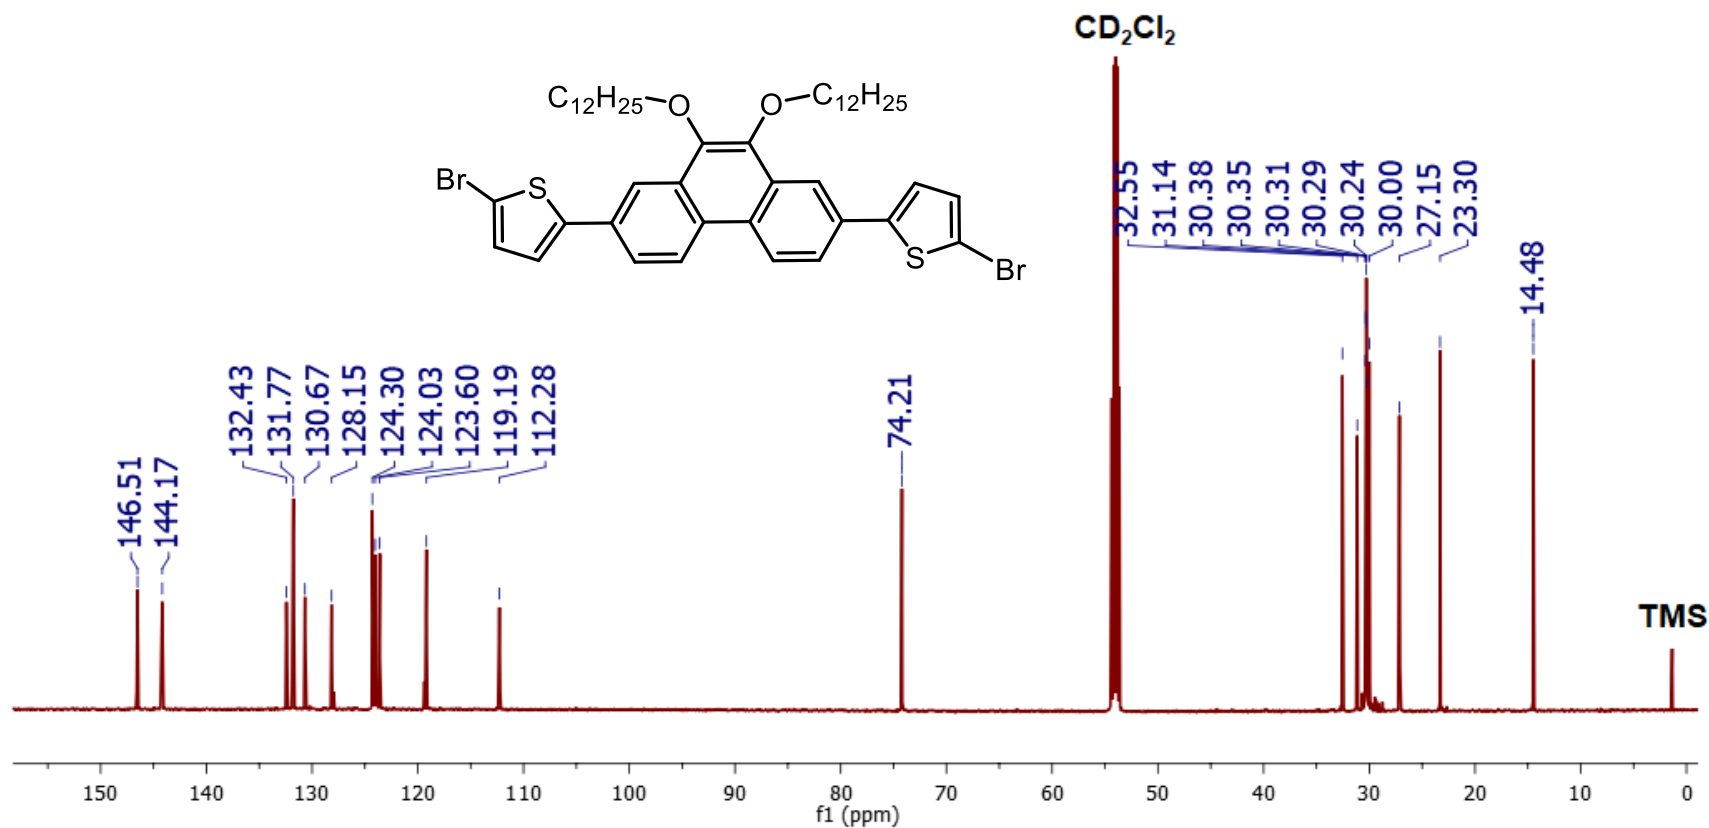

Figure S9:  $^{13}\text{C}$  NMR spectrum of **PNM1** ( $\text{CD}_2\text{Cl}_2$ , 150 MHz)

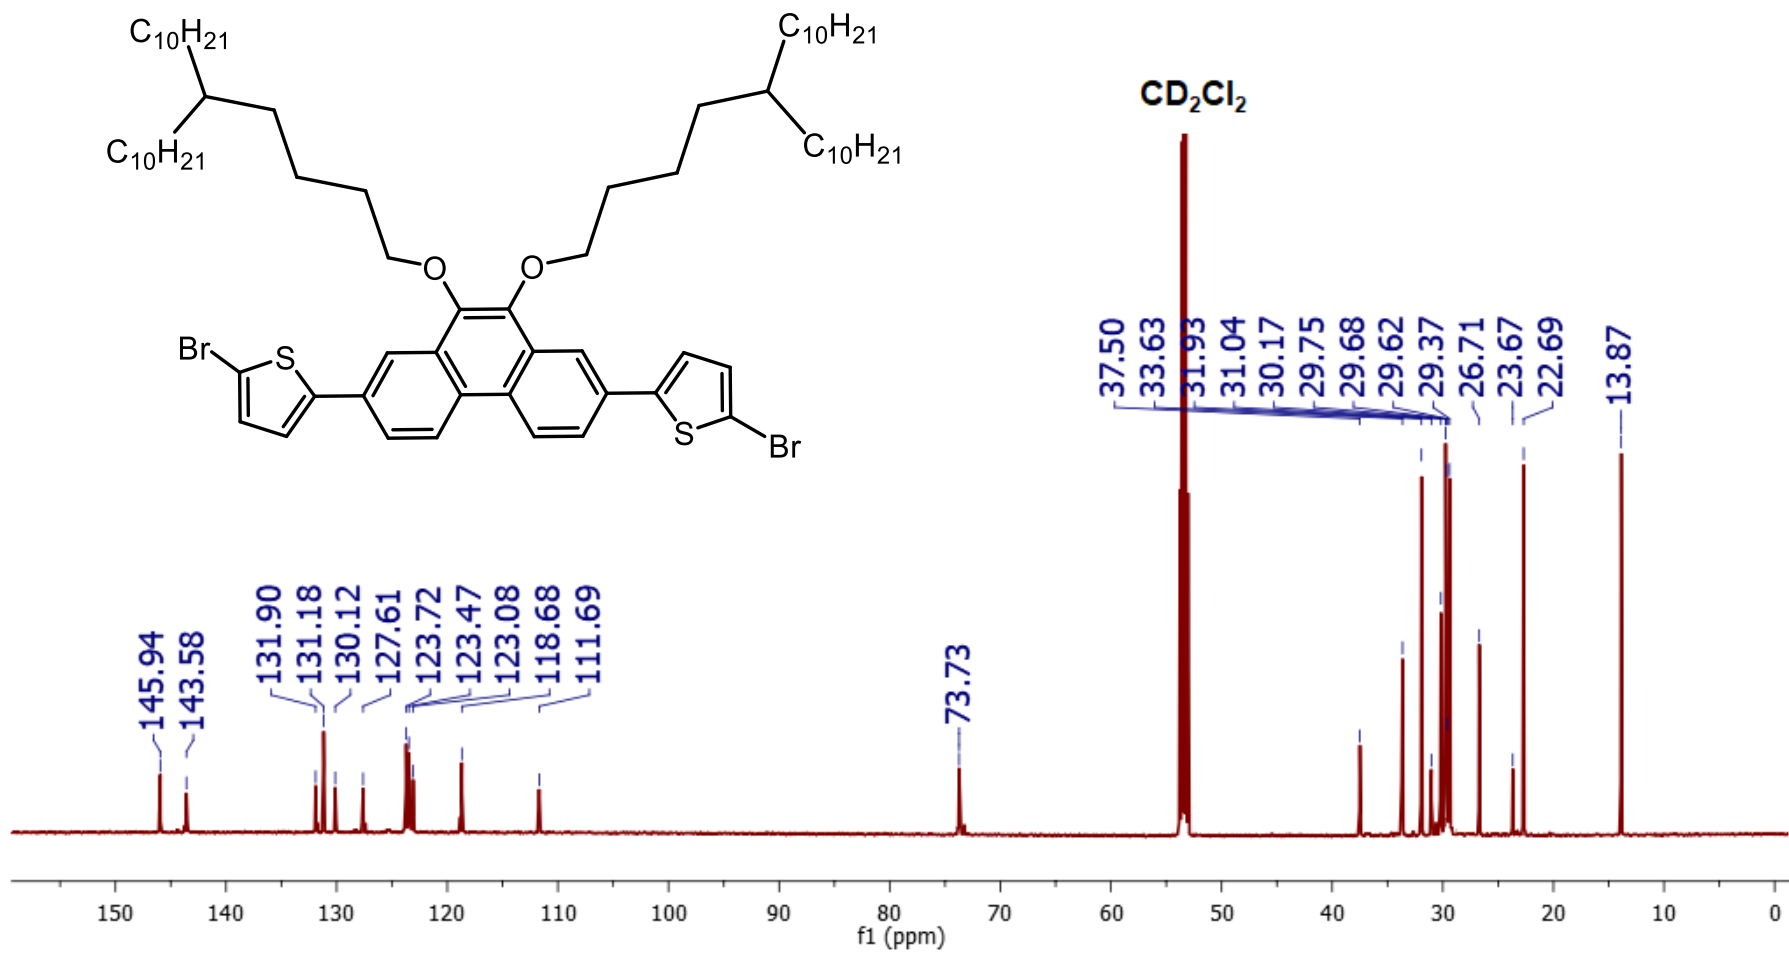

Figure S10: <sup>13</sup>C NMR spectrum of PNM2 (CD<sub>2</sub>Cl<sub>2</sub>, 150 MHz)

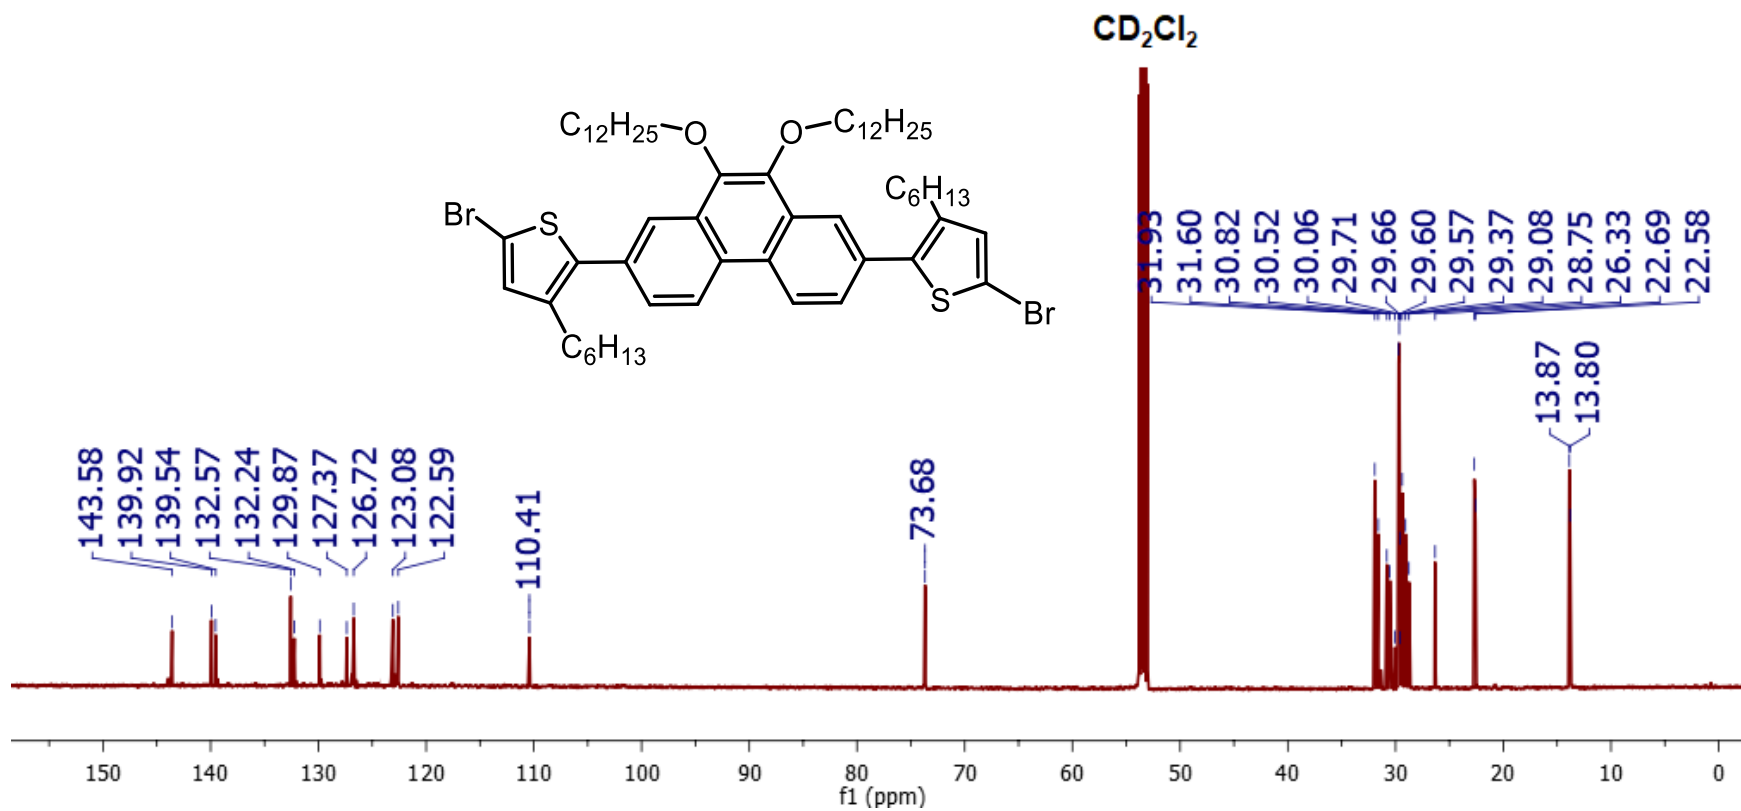

Figure S11:  $^{13}\text{C}$  NMR spectrum of PNM3 (CD<sub>2</sub>Cl<sub>2</sub>, 150 MHz)

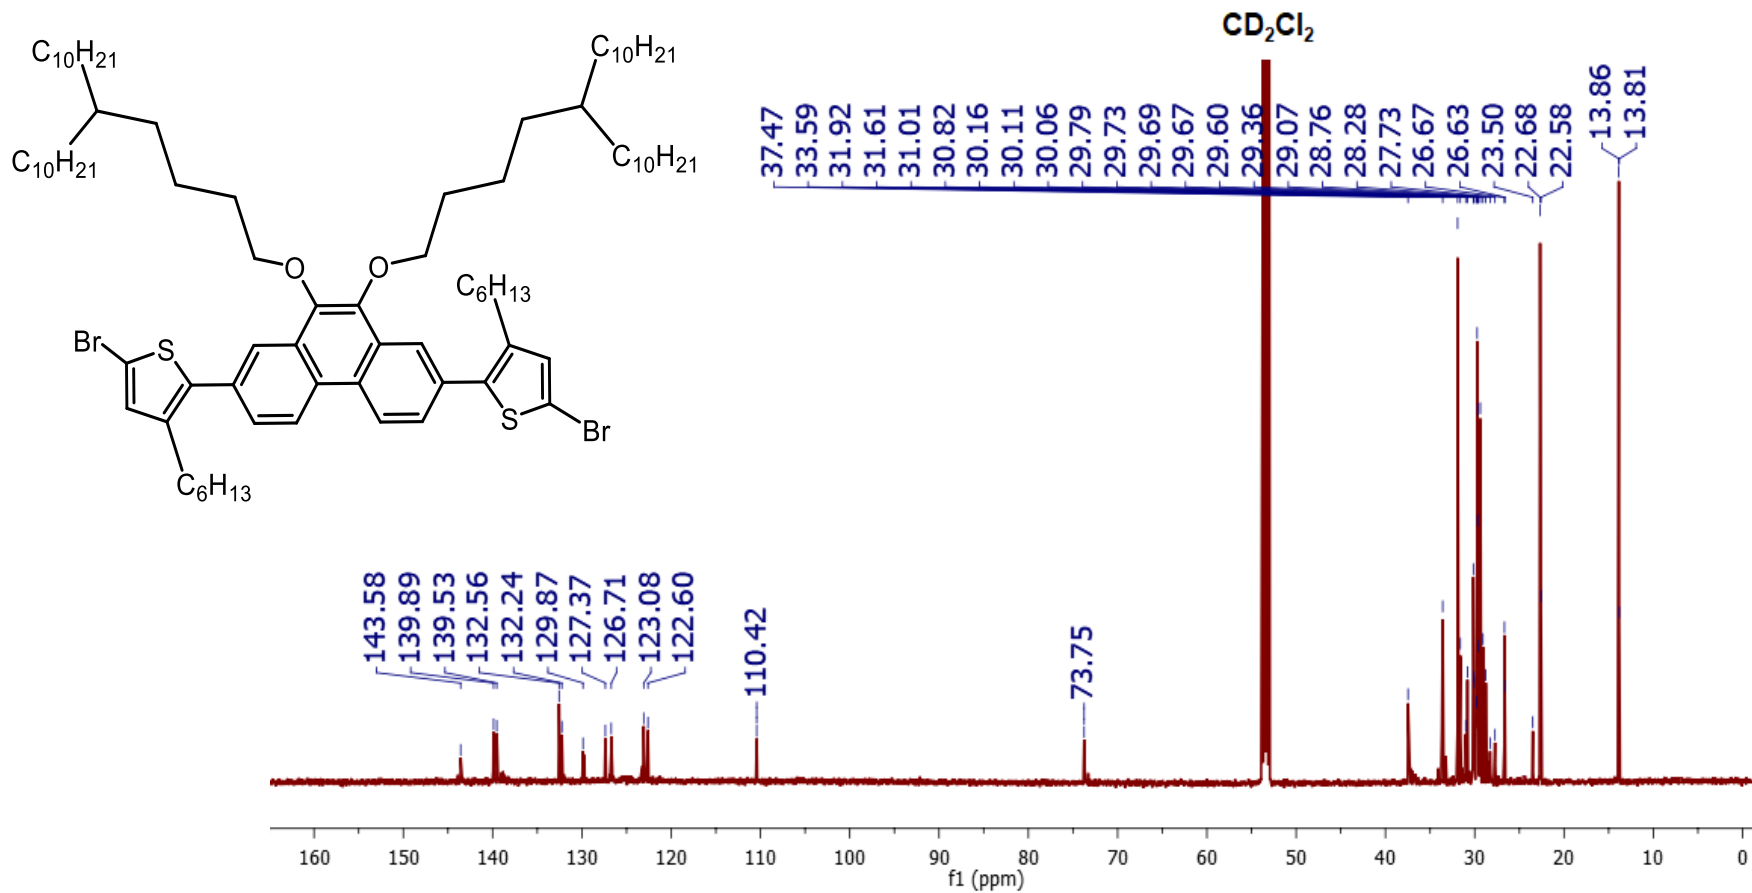

Figure S12:  $^{13}\text{C}$  NMR spectrum of **PNM4** (CD<sub>2</sub>Cl<sub>2</sub>, 150 MHz)

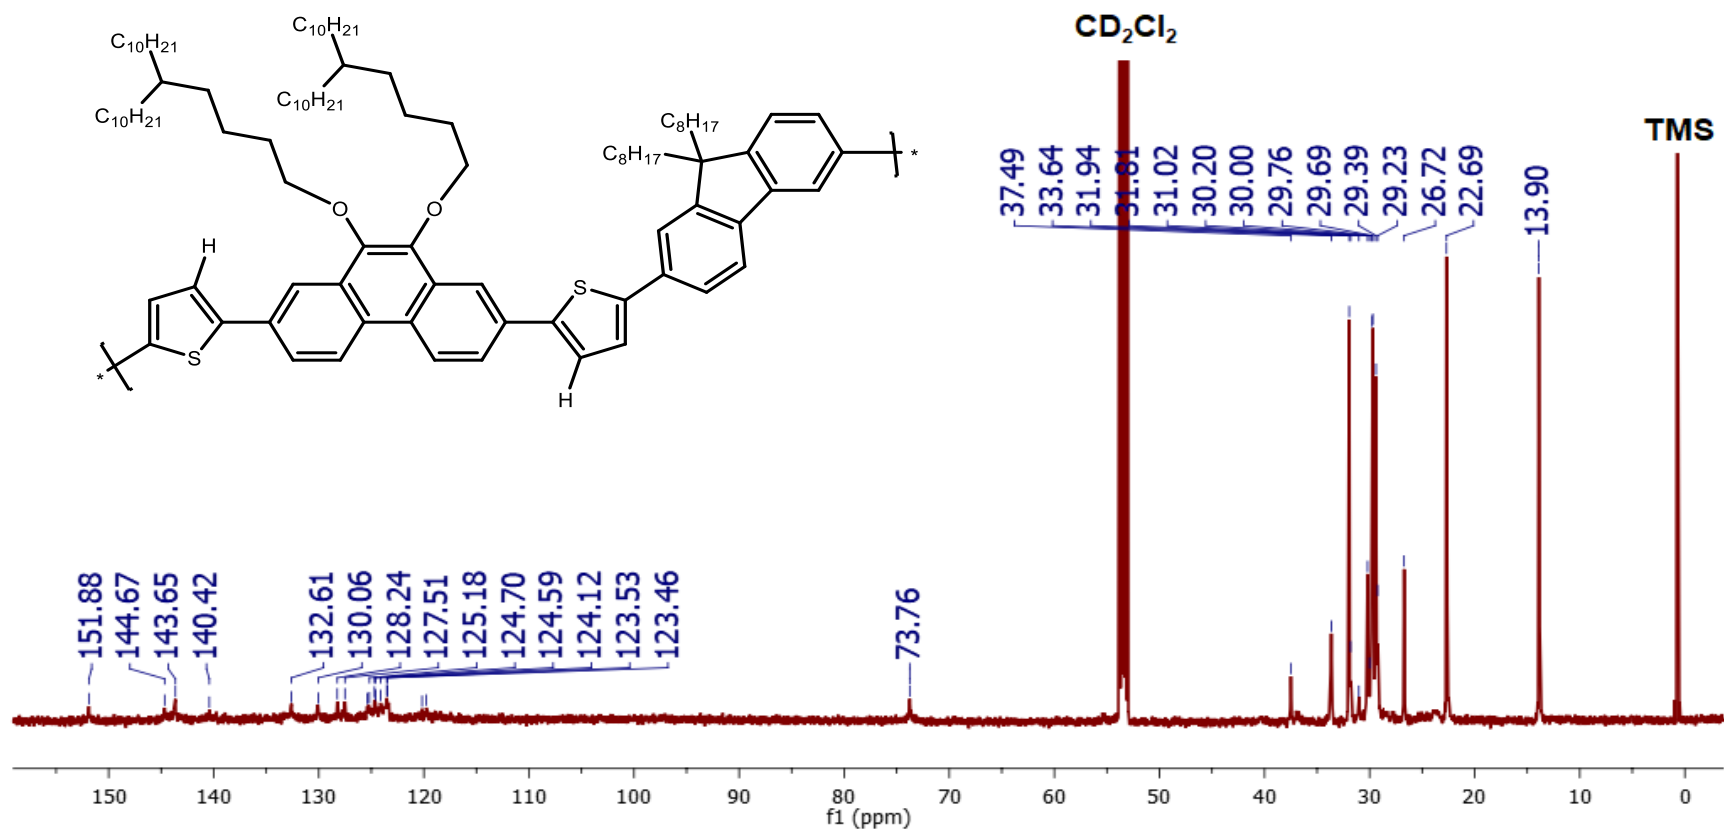

**Figure S13:** <sup>13</sup>C NMR spectrum of **PNP2** (CD<sub>2</sub>Cl<sub>2</sub>, 150 MHz)

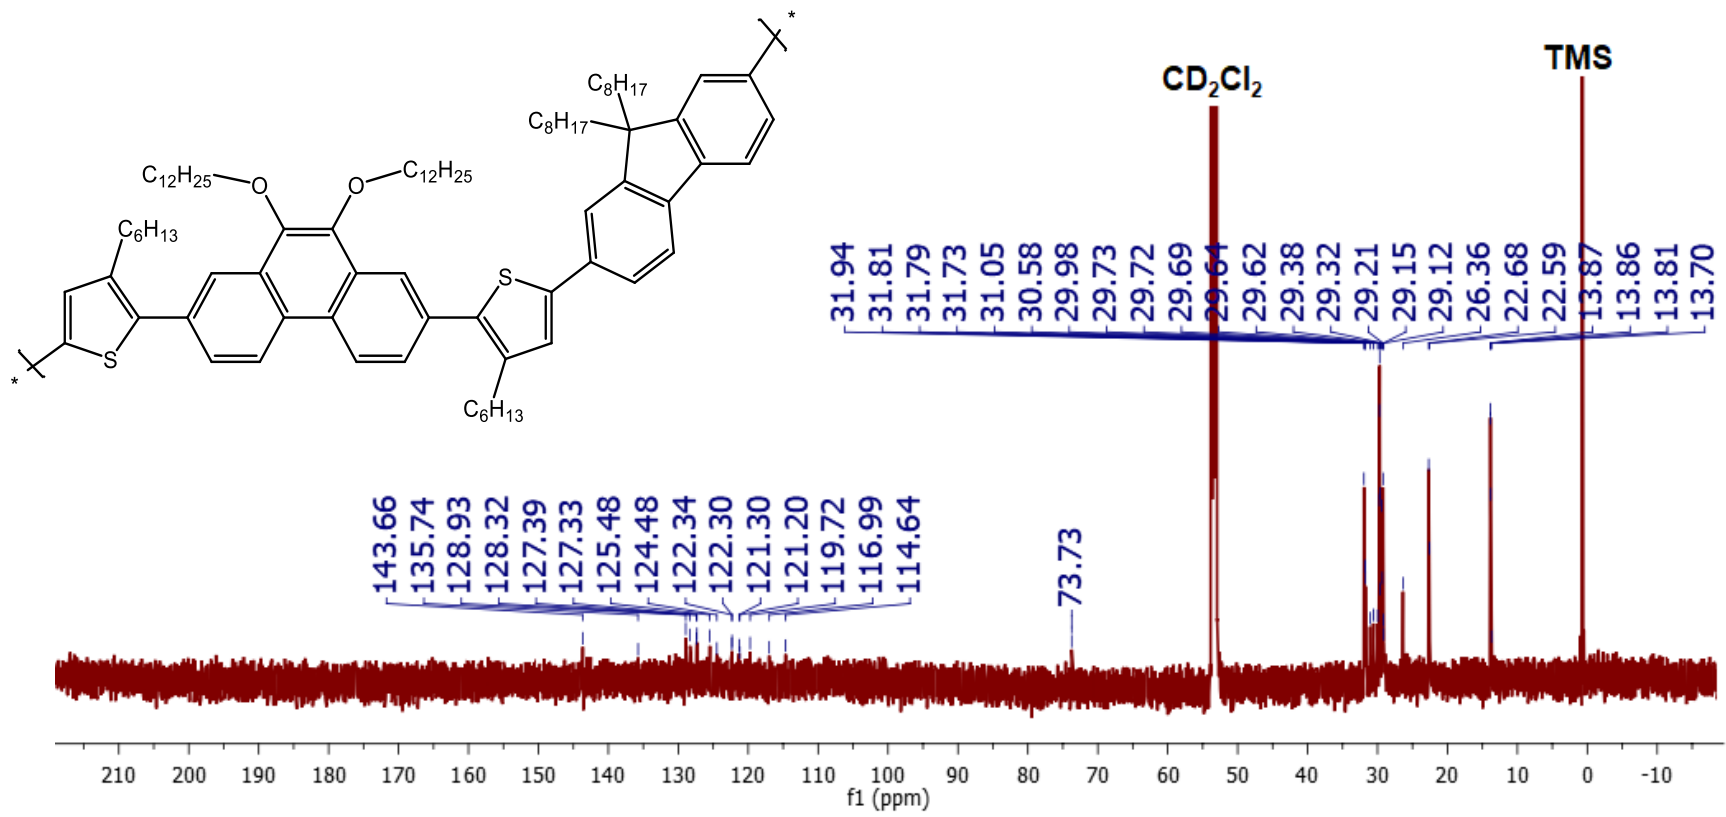

Figure S14: <sup>13</sup>C NMR spectrum of PNP3 (CD<sub>2</sub>Cl<sub>2</sub>, 150 MHz)

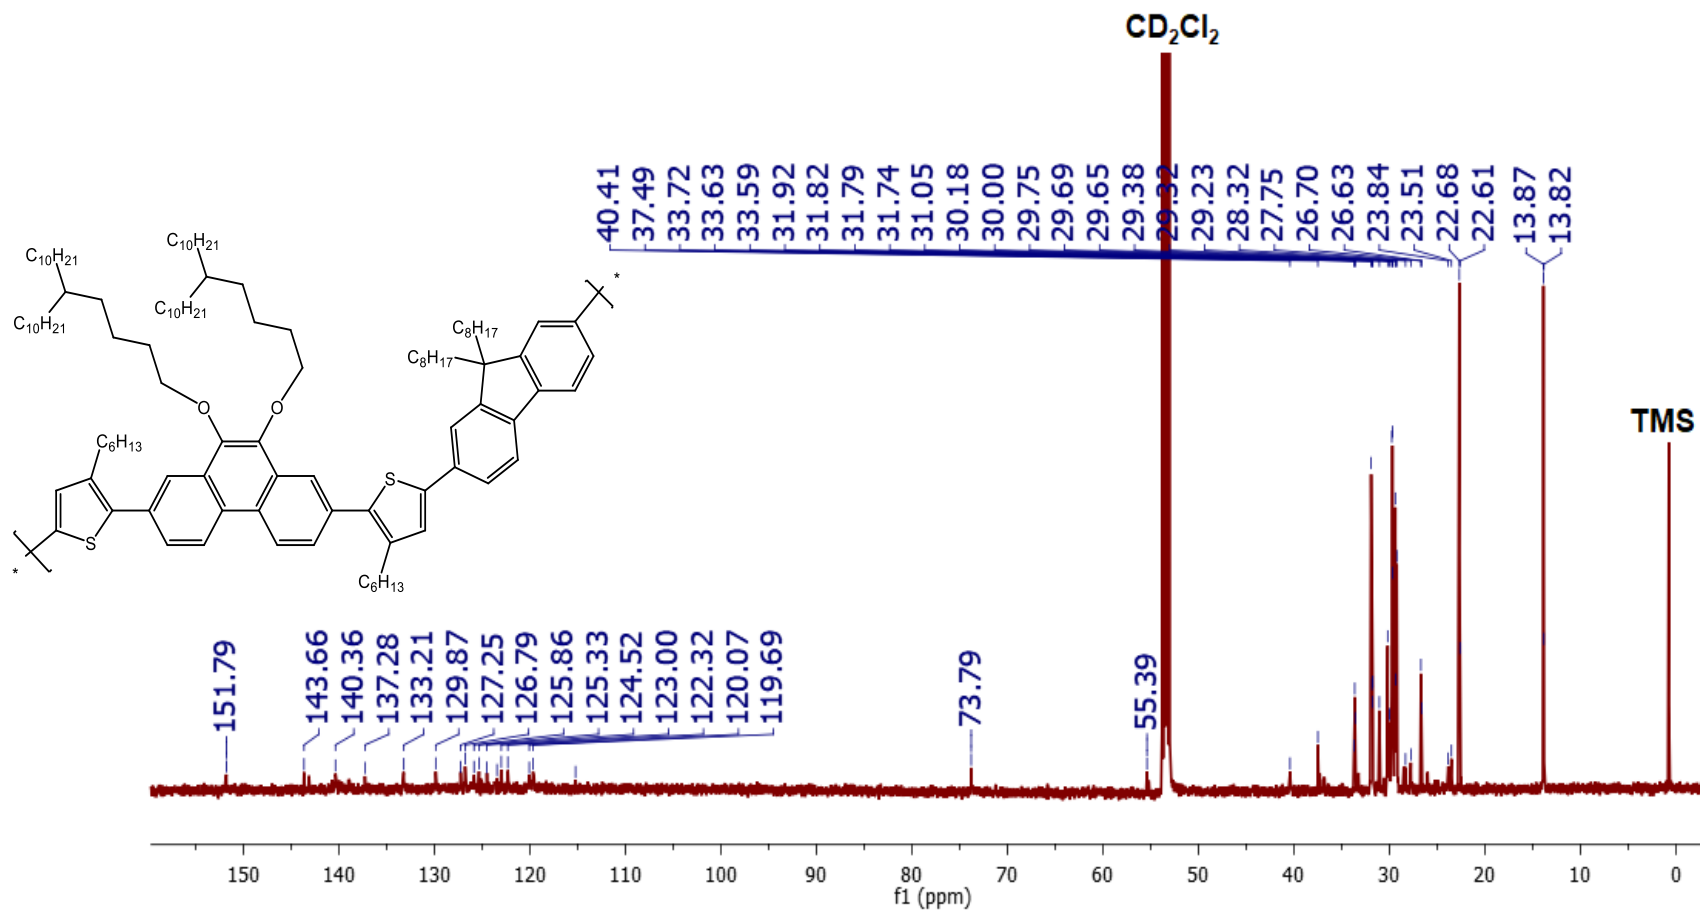

Figure S15:  $^{13}\text{C}$  NMR spectrum of PNP4 ( $\text{CD}_2\text{Cl}_2$ , 150 MHz)



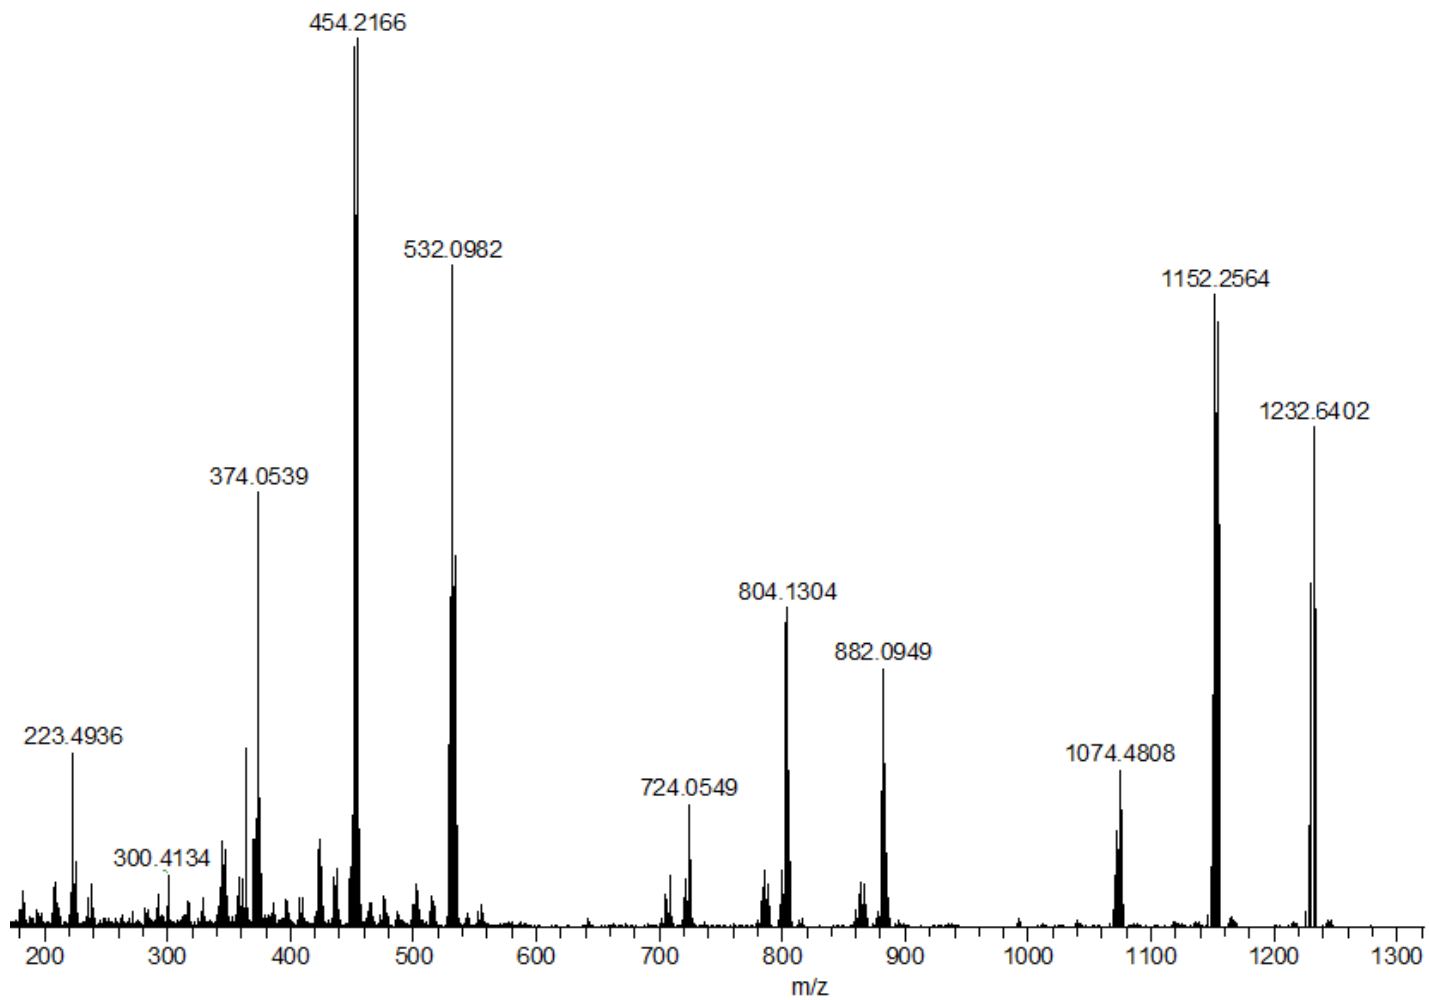

**Figure S16: EI-HRMS of PNM2**

calculated for  $M^+$   $C_{58}H_{84}O_2Br_2S_2$  1038.4233 found 1038.4230.

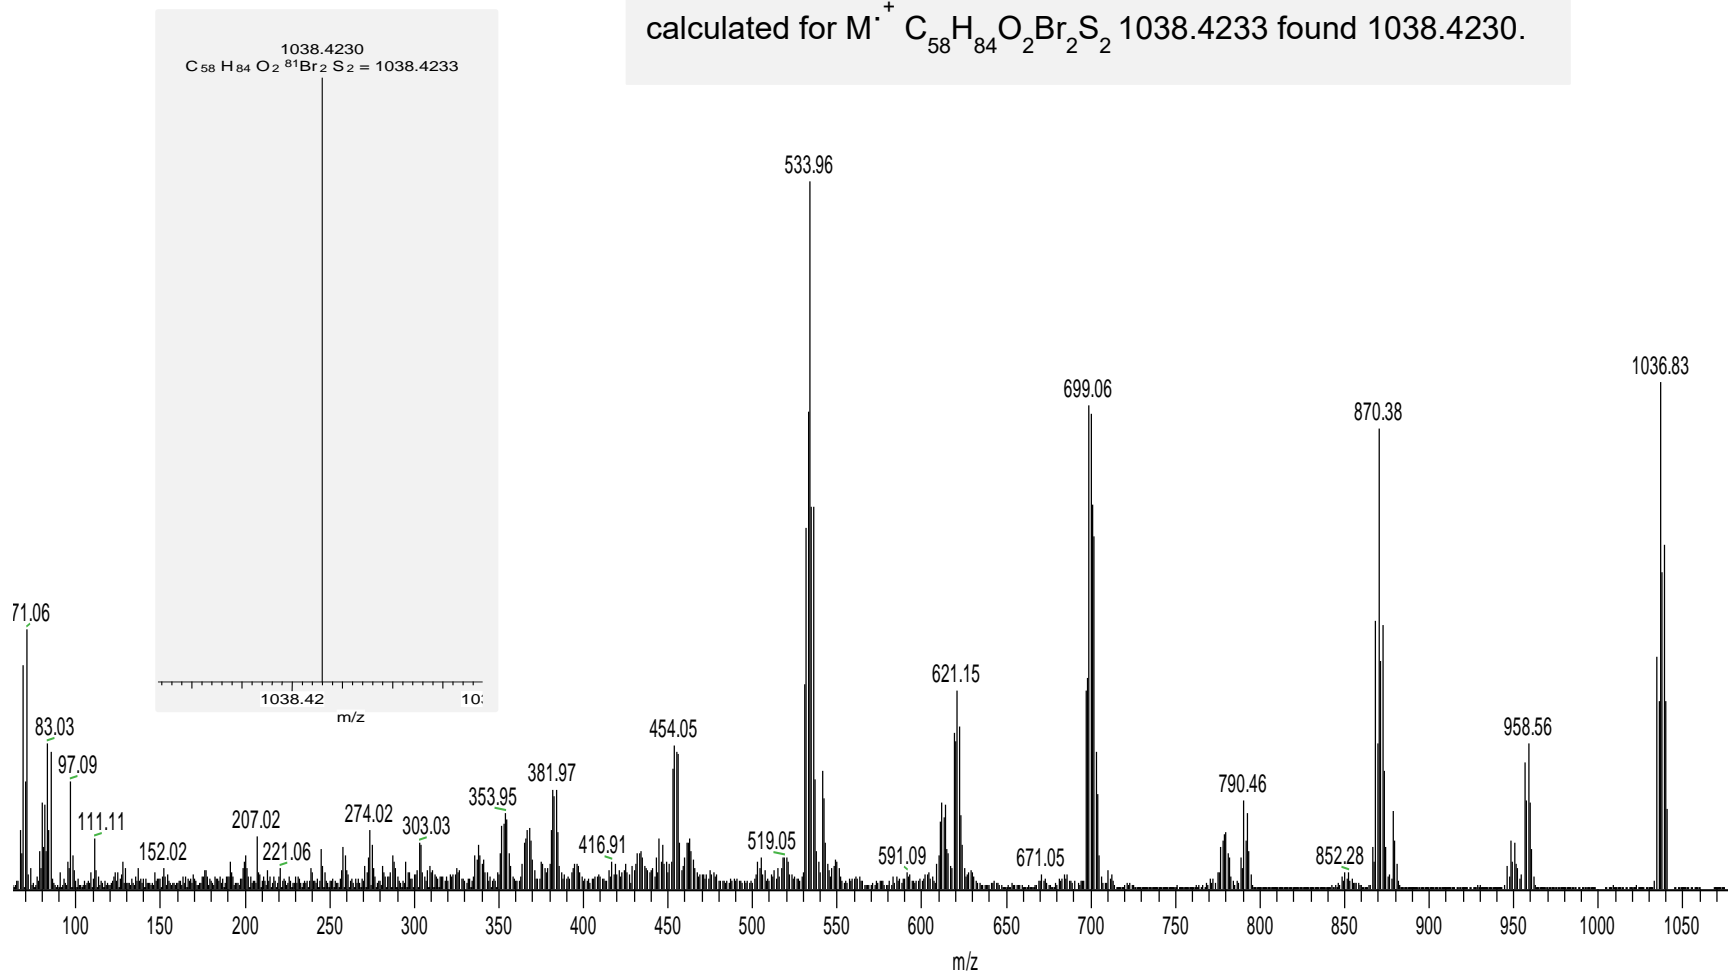

**Figure S17: EI-HRMS of PNM3**

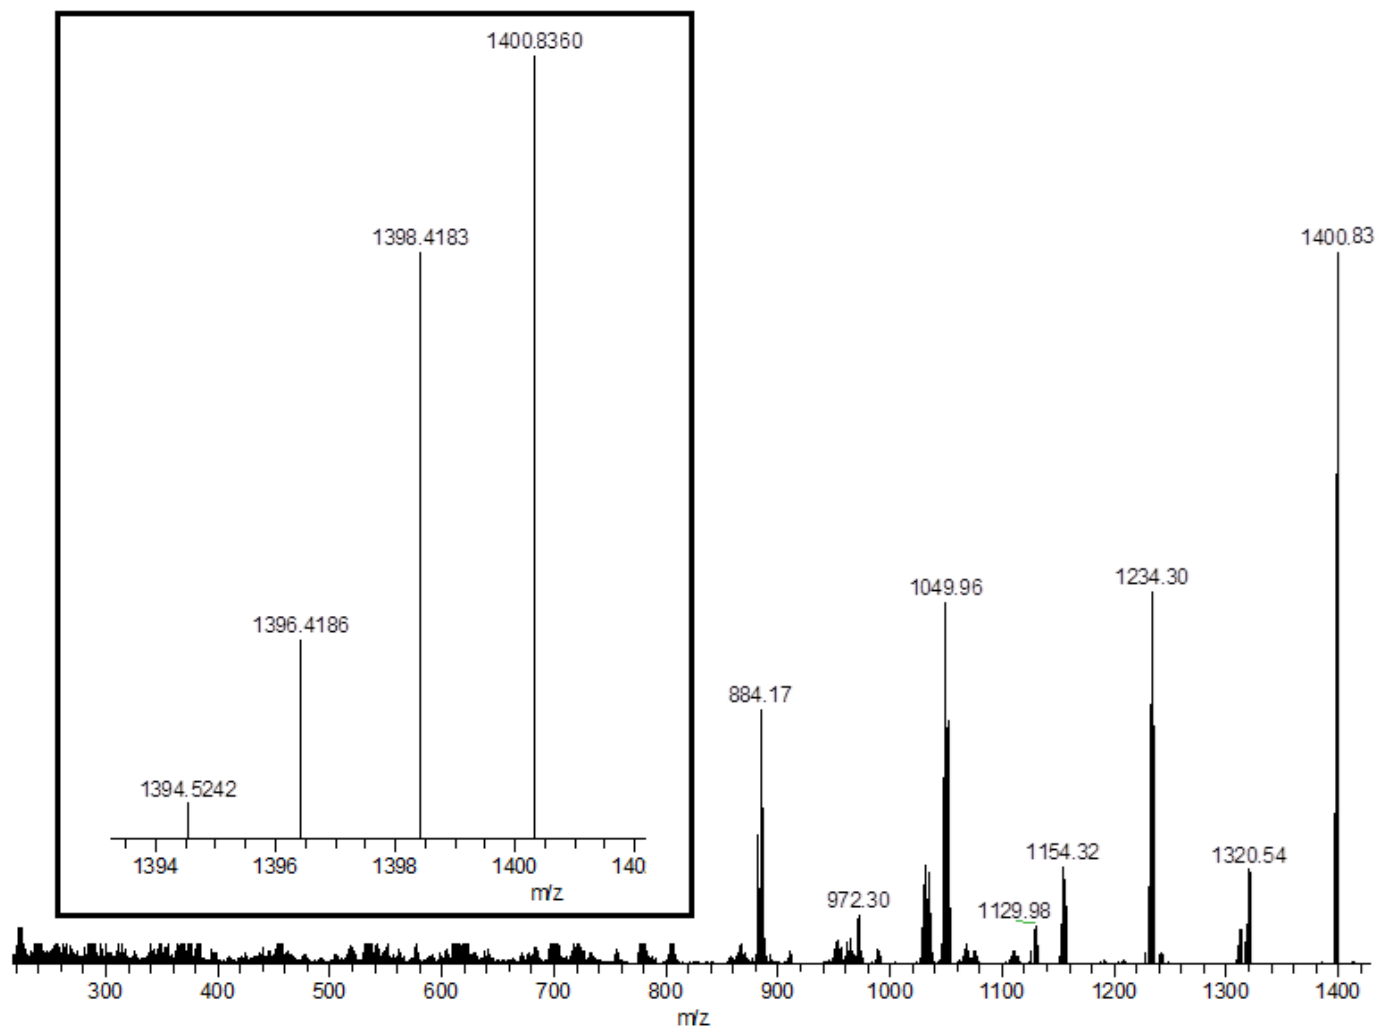

**Figure S18: EI-HRMS of PNM4**

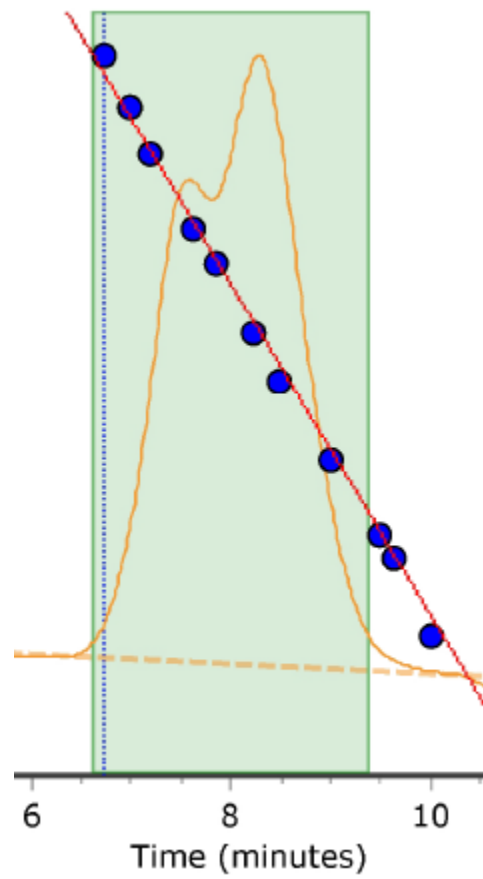

**Figure S19: GPC of PNP1**

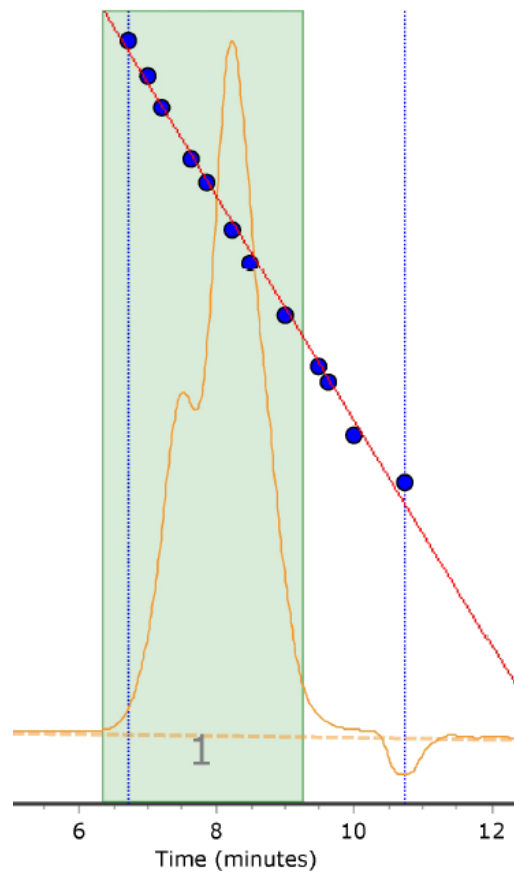

**Figure S20: GPC of PNP2**

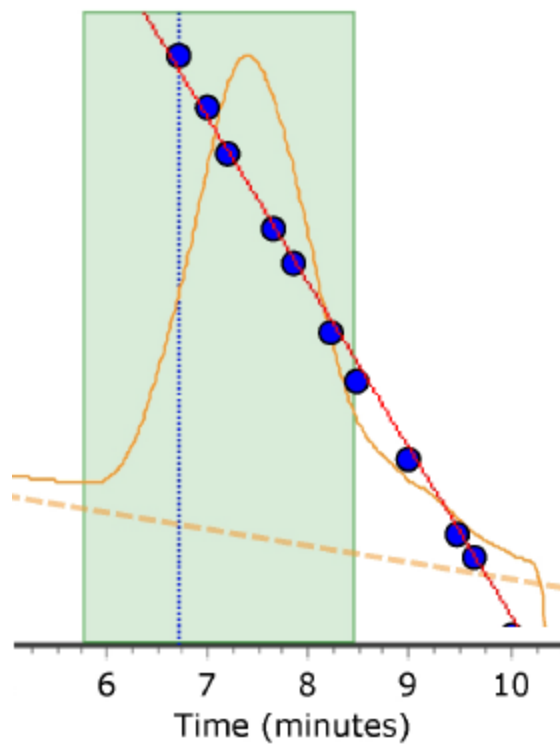

**Figure S21:** GPC of PNP3

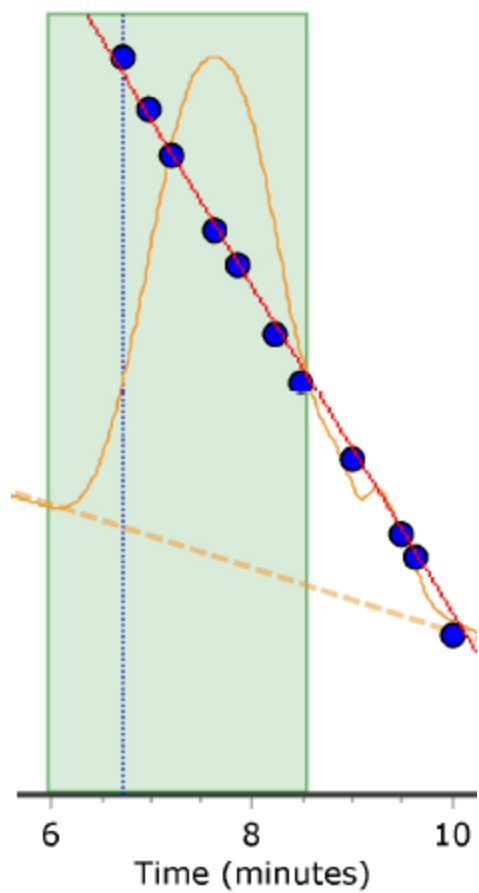

**Figure S22: GPC of PNP4**

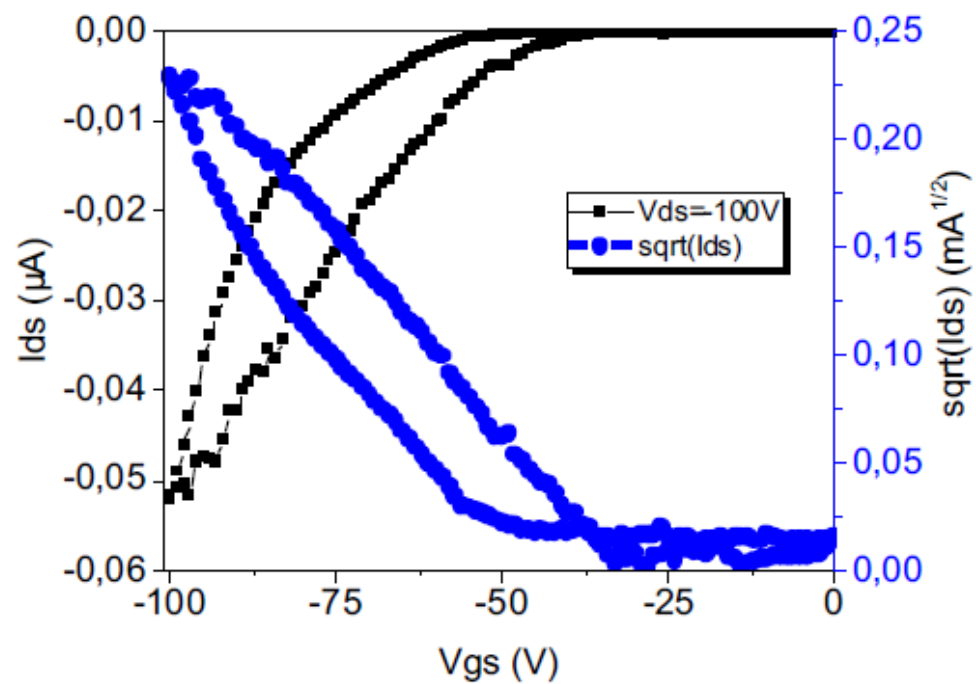

**Figure S23:** Transfer characteristics in the saturation regime of an annealed hole-only **PNP1** OFET



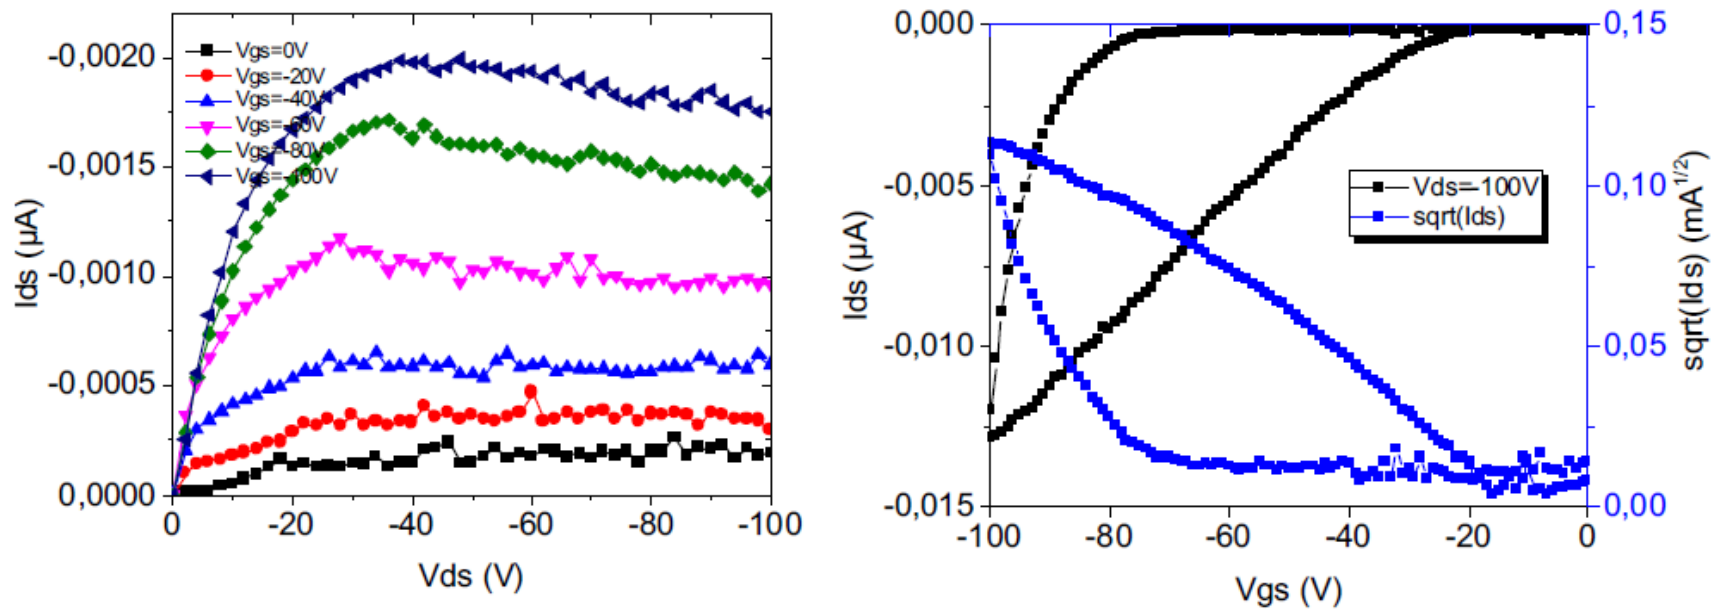

**Figure S24:** Output characteristic of an annealed hole-only **PNP2** OFET (left) and transfer characteristics in the saturation regime of an annealed hole-only **PNP2** OFET (right)

## DFT calculations

Table S1. Optimized structures and HOMO-LUMO frontier orbitals of **PNP1-4** at the level of the B3LYP/6-31G\* basis set with methyl groups instead of alkyl chains for phenanthrene and fluorene units for simplicity. With R = H (**PNP1,2**) or Me (**PNP3,4** - instead of the hexyl groups) on the thienyl units.

| Entry               | PNP1,2                                                                               |       |       |       | PNP3,4                                                                                |       |       |     |
|---------------------|--------------------------------------------------------------------------------------|-------|-------|-------|---------------------------------------------------------------------------------------|-------|-------|-----|
| Optimized structure | 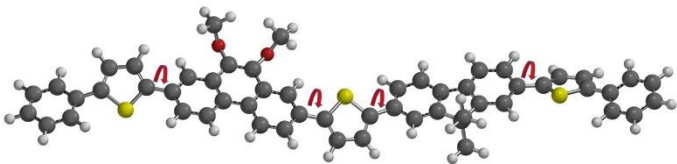   |       |       |       |    |       |       |     |
| Dihedral Angle      | 22.1°                                                                                | 21.2° | 27.6° | 25.9° | 40.9°                                                                                 | 40.7° | 22.9° | 23° |
| HOMO                |   |       |       |       |   |       |       |     |
| LUMO                |  |       |       |       |  |       |       |     |

**Table S2. Observed and calculated HOMO-LUMO orbitals of PNP1-4.**

| Entry                     | HOMO <sup>a</sup><br>(eV) | LUMO <sup>a</sup><br>(eV) | HOMO-LUMO gap (eV) |      | Uv-Vis Absorption (nm) |                       |
|---------------------------|---------------------------|---------------------------|--------------------|------|------------------------|-----------------------|
|                           |                           |                           | Obs. <sup>b</sup>  | Cal. | $\lambda_{\max}$ Obs.  | $\lambda_{\max}$ Cal. |
| <b>PNP1,2</b>             | -5.03                     | -1.84                     | 2.72               | 3.19 | 433                    | 431                   |
| <b>PNP3,4<sup>c</sup></b> | -4.98                     | -1.67                     | 2.86               | 3.31 | 398                    | 414                   |

[a] Calculated at the level of the B3LYP/6-31 G\* basis set with methyl groups instead of alkyl chains for phenanthrene and fluorene units for simplicity. [b] Determined from 0 $\rightarrow$ 0 transitions. [c] with R = CH<sub>3</sub> (on the thienyl unit).
